# Supplementary material for: Respiratory Telerehabilitation of Boys and Young Men with Duchenne Muscular Dystrophy in the COVID-19 Pandemic
Source: MDPI journal article supplement (doi:10.3390/ijerph18126179), 2021-06-08
Supplement: s1 [file s1]

**Supplementary Table S1.** The individual age, VS Score, and BS scale of each of the 45 participants.

| Patient | Age | VS | BS |
|---------|-----|----|----|
| 1       | 13  | 1  | 1  |
| 2       | 7   | 2  | 1  |
| 3       | 10  | 3  | 1  |
| 4       | 12  | 9  | 2  |
| 5       | 10  | 1  | 1  |
| 6       | 8   | 2  | 1  |
| 7       | 17  | 9  | 2  |
| 8       | 10  | 2  | 2  |
| 9       | 10  | 2  | 2  |
| 10      | 16  | 9  | 2  |
| 11      | 14  | 1  | 1  |
| 12      | 15  | 9  | 2  |
| 13      | 24  | 9  | 6  |
| 14      | 2,5 | 2  | 1  |
| 15      | 4   | 2  | 2  |
| 16      | 6   | 1  | 2  |
| 17      | 22  | 9  | 5  |
| 18      | 7   | 1  | 1  |
| 19      | 5,5 | 1  | 1  |
| 20      | 8   | 1  | 1  |
| 21      | 10  | 9  | 1  |
| 22      | 21  | 9  | 2  |
| 23      | 24  | 9  | 5  |
| 24      | 7   | 2  | 2  |
| 25      | 5   | 1  | 1  |
| 26      | 7   | 2  | 1  |
| 27      | 15  | 9  | 3  |
| 28      | 16  | 4  | 1  |
| 29      | 4   | 2  | 1  |
| 30      | 15  | 9  | 3  |
| 31      | 12  | 9  | 1  |
| 32      | 2,5 | 2  | 1  |
| 33      | 4   | 2  | 1  |
| 34      | 14  | 4  | 3  |
| 35      | 12  | 9  | 2  |
| 36      | 12  | 3  | 1  |
| 37      | 12  | 3  | 1  |
| 38      | 7   | 1  | 1  |
| 39      | 12  | 3  | 2  |
| 40      | 4   | 2  | 1  |
| 41      | 9   | 9  | 1  |
| 42      | 22  | 9  | 6  |
| 43      | 14  | 9  | 5  |
| 44      | 8   | 2  | 1  |
| 45      | 3   | 2  | 1  |
